# Supplementary material for: Cu–Ni alloy decorating N-doped carbon nanosheets toward high-performance electrocatalysis of mildly acidic CO2 reduction
Source: Royal Society of Chemistry journal article supplement (doi:10.1039/d3qi00207a), 2023-01-01
Supplement: d3qi00207a1.pdf [file d3qi00207a1.pdf]

**Supporting information**

**Cu-Ni Alloy Decorating N-Doped Carbon Nanosheets toward High-performance**

**Electrocatalysis of Mildly Acidic CO<sub>2</sub> Reduction**

Weifan Pan<sup>a,b</sup>, Peng Wang<sup>a</sup>, Linfeng Fan<sup>a</sup>, Kai Chen<sup>a</sup>, Luocai Yi<sup>a</sup>, Junheng Huang<sup>a</sup>, Pingwei Cai<sup>a</sup>, Xi Liu<sup>a</sup>, Qingsong Chen<sup>a</sup>, Genxiang Wang<sup>a\*</sup>, Zhenhai Wen<sup>a\*</sup>

<sup>a</sup> CAS Key Laboratory of Design and Assembly of Functional Nanostructures, and Fujian Provincial Key Laboratory of Materials and Techniques toward Hydrogen Energy, Fujian Institute of Research on the Structure of Matter, Chinese Academy of Sciences, Fuzhou, Fujian, 350002, China

<sup>b</sup> University of Chinese Academy of Sciences, Beijing 100049, China

## 1. Materials

Raw materials involved in this work include phenol (AR, 99%), formaldehyde (AR, 37 wt%), sodium hydroxide (AR 96%), pluronic F-127, Zinc nitrate hexahydrate (AR, 98%), copper (II) nitrate hexahydrate (AR, 99%), nickel (II) nitrate hexahydrate (AR, 98%), 2-methylimidazole, hydrochloric acid, ethyl alcohol, isopropanol. The Nafion (5%) was purchased from Aladdin, and carbon paper was obtained from Hesen (HCP135), respectively. All reagents were used as received.

## 2. Methods

Electrochemical measurements were performed on a CHI 760E electrochemical workstation (ShangHai, China) with a three-electrode system in typical H-Cell (GaossUnion, TianJin) / Flow cell (self-assembly) separated by Nafion\*117 (Dupond) membrane between cathode and anode. Gas phase products were analyzed by Gas Chromatography (SHIMADZU GC2014). Liquid product was detected by nuclear magnetic resonance spectrometer (<sup>1</sup>HNMR) on ECZ600R. Microstructure images were taken using field emission scanning electron microscope (SEM, SU-8010). High-resolution TEM images as well as element mapping were obtained using transmission electron microscope (TEM, Tecnai F20). The raman spectrums were performed on a Renishaw InVia Raman Microscope (532). X-ray diffraction spectra were taken by a Rigaku Miniflex 600 powder diffractometer. X-ray photoelectron spectra were carried out using ESCALAB 250Xi. The metal content was measured by Inductive Coupled Plasma Emission Spectrometer (Ultima 2).

### 2.1 Preparation of Resol-F127 solution.

The Resol-F127 solution was prepared undergoing the following steps: 0.6 g phenol, formaldehyde solution (2.1 mL, 37 wt% in H<sub>2</sub>O), and an aqueous NaOH solution (15 mL, 0.1 M) were mixed and stirred at 70 °C for 30 min in a three-necked flask to obtain low-molecular-weight phenolic resols. Then, 65 mL aqueous solution containing 0.96 g F-127 was added and keep stirring under 340 rpm at 65 °C for further 15 h.

### 2.2 Preparation of CuNi-ZIF-8 suspension.

Typically, CuNi-ZIF-8 suspension liquid were synthesized using a one-step method in aqueous solution at room temperature. First, 0.8925 g Zn(NO<sub>3</sub>)<sub>2</sub>·6H<sub>2</sub>O, 0.0363 g Cu(NO<sub>3</sub>)<sub>2</sub>·3H<sub>2</sub>O and 0.0436 g Ni(NO<sub>3</sub>)<sub>2</sub>·6H<sub>2</sub>O were dissolved in 25 mL DI water via vigorously stirring to get a homogenous solution A. 1.2 g 2-methylimidazole was dissolved in 25 mL DI water to prepare solution B. Subsequently, poured solution A to solution B, and kept the reaction under ultrasonic processing for 1 h.

### 2.3 Preparation of Resol-F127 @ CuNi-ZIF-8 Composite.

24mL CuNi-ZIF-8 suspension, 8 mL Resol-F127 solution were thoroughly mixed by stirring for 30 min. Then the mixed suspension was transferred to a Teflon-lined autoclave for reaction at 150 °C for 20 h at a heating rate of 4 °C min<sup>-1</sup> to reaction temperature. Following completion of the reaction, the autoclave was allowed to cool down to room temperature. After centrifugation and washed by water, the product was dried in a lyophilizer for 24 h to obtain Resol-F127 @ CuNi-ZIF-8 composite.

### 2.4 Synthesis of CuNi-N-CNS

A freshly prepared resol-F127 @ CuNi-ZIF-8 composite was transferred to a tube furnace and carbonized under a Ar atmosphere at 350 °C for 1 h, then at 900 °C for 2 h with a heating rate of 3 °C min<sup>-1</sup>. After cooling to room temperature, the powder obtained was immersed in 2 M hydrochloric acid for 2 h to remove unstable metal impurities. The CuNi-N-CNS was then obtained after centrifugation, washing and drying.

### 2.5 Synthesis of contrast samples

The controlled samples, *i. e.* Ni-N-CNS, Cu-N-CNS and N-CNS, were prepared by the similar method with that of CuNi-N-CNS apart from without addition of Cu salt, Ni salt, and metal salts, respectively.

## 3. CO<sub>2</sub>RR performance evaluation

### 3.1 H-type cell

Electrolysis was performed in a gas-tight H-type electrolyzer separating by a cation exchange membrane (Nafion 117). The Ag|AgCl electrode, platinum mesh (1\*1 cm<sup>2</sup>) and carbon paper (1\*1 cm<sup>2</sup>) acted as the reference electrode, counter electrode and work electrode, respectively. The work electrode was fabricated as the following processes: 100 μL of the catalyst ink was drop-casted on carbon paper electrode to achieve an approximately 1mg cm<sup>-2</sup> loading amount and then dried under an infrared light. And 0.5 M KHCO<sub>3</sub> aqueous solution was used as the electrolyte, and the electrolyte was bubbled with CO<sub>2</sub> at least 20 min with a flow rate of 20 mL min<sup>-1</sup> before electrolysis, the pH of the CO<sub>2</sub> saturated 0.5 M KHCO<sub>3</sub> was about 7.25. Then 1mL of gas was injected into gas chromatography from the outlet to analyze the composition of gas phase products. The detectors are calibrated by two different concentrations (H<sub>2</sub>: 99.3 ppm and 10000 ppm; CO: 99.3 ppm and 10000 ppm) of standard gases.

### 3.2 Flow cell

Self-assembly flow cell was used to achieve great CO<sub>2</sub>RR performance at high current densities. The device generally included a cathode chamber, an anode chamber and a proton exchange membrane (see Fig. 4a and supplementary Fig. S19). A commercial RuIrTi mesh is used as anode and an Ag|AgCl is acted as the reference. 3 M KCl and 1 M KOH are used as the cathode and anode electrolyte, respectively. The cathode chamber and anode chamber is separated by a piece of Nafion 117 membrane. Electrolytes are cycled at 100 mL min<sup>-1</sup> and the CO<sub>2</sub> gas is supplied at rate of 20 mL min<sup>-1</sup>. The pH of CO<sub>2</sub> saturated 3 M KCl presents a mildly acid environment with pH 4.25.

### 4. Electrochemical measurement in three-electrode system

All the potentials were quoted with respect to reversible hydrogen electrode (RHE) through RHE calibration according to the formula:

$$E (\text{vs. RHE}) = E (\text{vs. Ag|AgCl}) + E^{\square} (\text{Ag|AgCl}) + 0.059 \times \text{pH}$$

$$E (\text{vs. RHE}) = E (\text{vs. Ag|AgCl}) + 0.197 \text{ V} + 0.059 \times \text{pH} \quad (\text{Eq. 1})$$

The faradaic efficiency of gas product was calculated based on the following equation (Eq. 2):

$$FE = \frac{Q}{Q_{\text{total}}} = \frac{n z F}{RT} \times \frac{P V_x}{\int i dt} \quad (\text{Eq. 2})$$

Where z is the number of electrons transferred per mole of gas products, n is the amount of substance of product, F is Faradaic constant 96485 C/mol, Q and  $\int i dt$  are total passed charge within time t. And t is the time that needs to fill the sample injector at a constant CO<sub>2</sub> gas flow rate, V<sub>x</sub> is the volume fraction of the obtained gaseous product i with time t (s), P is atmospheric pressure (1.01\*10<sup>5</sup> Pa), T is the temperature, R is the gas constant (8.314 J mol<sup>-1</sup> K<sup>-1</sup>).

The partial current density of j<sub>CO</sub> was calculated as following equation (Eq. 3)

$$j_{CO} = FE(CO) \times \frac{\int i dt}{t} \quad (\text{Eq. 3})$$

The turn over frequency (TOF, h<sup>-1</sup>) was calculated as following equation (Eq. 4)

$$TOF = \frac{j_{CO} * A / zF}{m_{cat}^w / M} \times 3600 \quad (\text{Eq. 4})$$

A: the surface area of the electrode (1 cm<sup>2</sup>)

z: the number of electron transferred for CO production

j<sub>CO</sub>: the partial current density (mA cm<sup>-2</sup>)

F: Faradaic constant 96485 C/mol

$m_{\text{cat}}$ : the mass loading on the work electrode (mg)

W: Ni or Cu weight loading in the catalyst based on the ICP results.

The liquid products from were detected by H1NMR. 500  $\mu\text{L}$  electrolyte after electrolysis was mixed with 100  $\mu\text{L}$   $\text{D}_2\text{O}$  containing 0.3  $\mu\text{L}$  DMSO.

**Table S1.** ICP-OES results of CuNi-N-CNS.

| Elements | Cu    | Ni    |
|----------|-------|-------|
| Wt%      | 2.60% | 2.39% |

**Table S2.** The E- $\text{CO}_2$ RR performance of recent reported catalysts.

| Catalysts                          | Electrolyte           | Electrolyzer | Long-term test | Potential             | Current density                                    | FE( $\text{CO}$ ) | Reference |
|------------------------------------|-----------------------|--------------|----------------|-----------------------|----------------------------------------------------|-------------------|-----------|
| Ni/Cu-N-C                          | 0.5 M $\text{KHCO}_3$ | H-Cell       | 60 h           | -0.79 V vs. RHE       | -30 $\text{mA cm}^{-2}$                            | 99.2%             | [1]       |
| Ni/Fe-N-C                          | 0.5 M $\text{KHCO}_3$ | H-Cell       | 30 h           | -0.7 V vs. RHE        | -7.4 $\text{mA cm}^{-2}$                           | 98.0%             | [2]       |
| NiSA/PCFM                          | 0.5 M $\text{KHCO}_3$ | H-Cell       | 15 h           | -1.0 V vs. RHE        | -28 $\text{mA cm}^{-2}$                            | 87.0%             | [3]       |
| Ni-N-CNS/CNT                       | 1 M KOH               | Flow Cell    | 26 h           | -0.73 V to -1.1 V     | -100 $\text{mA cm}^{-2}$ (constant current)        | 98.3%             | [4]       |
| Ni- $\text{N}_4$ /C- $\text{NH}_2$ | 0.5 M $\text{KHCO}_3$ | H-Cell       | 10 h           | -0.8 V vs. RHE        | -50 $\text{mA cm}^{-2}$                            | 90.0%             | [5]       |
| Ni-N-MEGO                          | 0.5 M $\text{KHCO}_3$ | H-Cell       | 21 h           | -0.55 V vs. RHE       | -13.7 $\text{mA cm}^{-2}$                          | 89.0%             | [6]       |
| Ni-NG                              | 0.5 M $\text{KHCO}_3$ | H-Cell       | 20 h           | -0.64 V vs. RHE       | -11 $\text{mA cm}^{-2}$                            | 85.0%             | [7]       |
| Ni-NG                              | 0.1 M $\text{KHCO}_3$ | Flow Cell    | 8 h            | 2.78 V (cell voltage) | 50 $\text{mA cm}^{-2}$                             | 90.0%             | [7]       |
| Ni/HMCS-3-800                      | 0.5 M $\text{KHCO}_3$ | H-Cell       | 10 h           | -0.9 V vs. RHE        | 6 $\text{mA cm}^{-2}$                              | 90.0%             | [8]       |
| CuNi-N-CNS                         | 0.5 M $\text{KHCO}_3$ | H-Cell       | 50 h           | -0.74 V vs. RHE       | 15 $\text{mA cm}^{-2}$ to 10 $\text{mA cm}^{-2}$   | ~95.0%            | This work |
| CuNi-N-CNS                         | 3 M KCl               | Flow cell    | 20 h           | -0.82 V vs. RHE       | 200 $\text{mA cm}^{-2}$ to 100 $\text{mA cm}^{-2}$ | 99% to 90%        | This work |

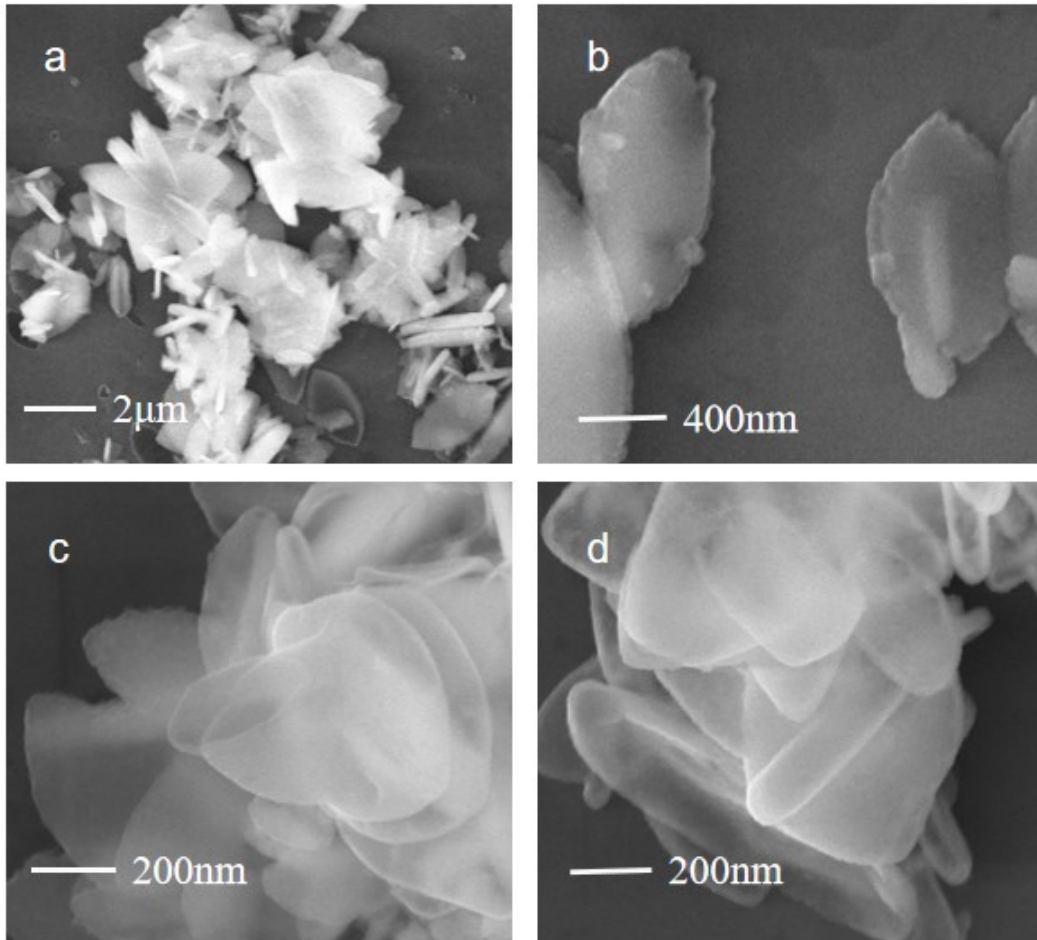

**Figure S1.** SEM (a-b) images for the first-step precursor (CuNi-ZIF-8) of CuNi-N-CNS. SEM (c-d) images for the second-step precursor (CuNi-ZIF-8 + Resol-F127-120°C) after hydrothermal reaction

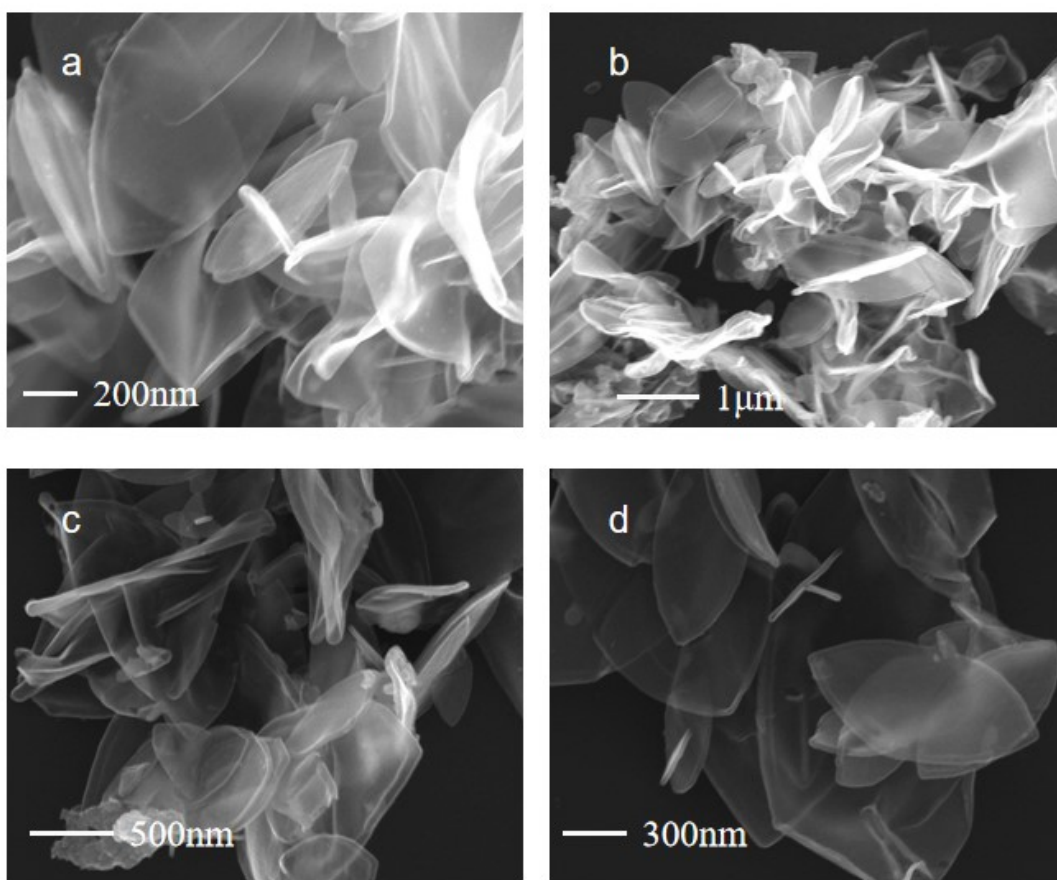

**Figure S2.** SEM patterns of (a) CuNi-N-CNS, (b) Ni-N-CNS, (c) Cu-N-CNS, (d) N-CNS.

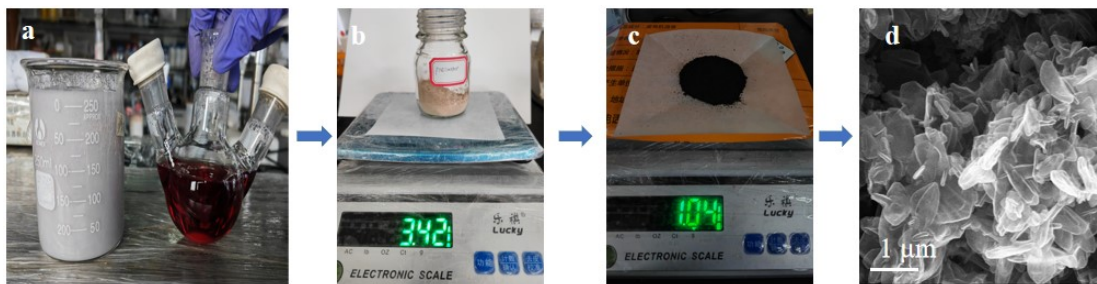

**Figure S3.** Gram-scale production of CuNi-N-CNS.

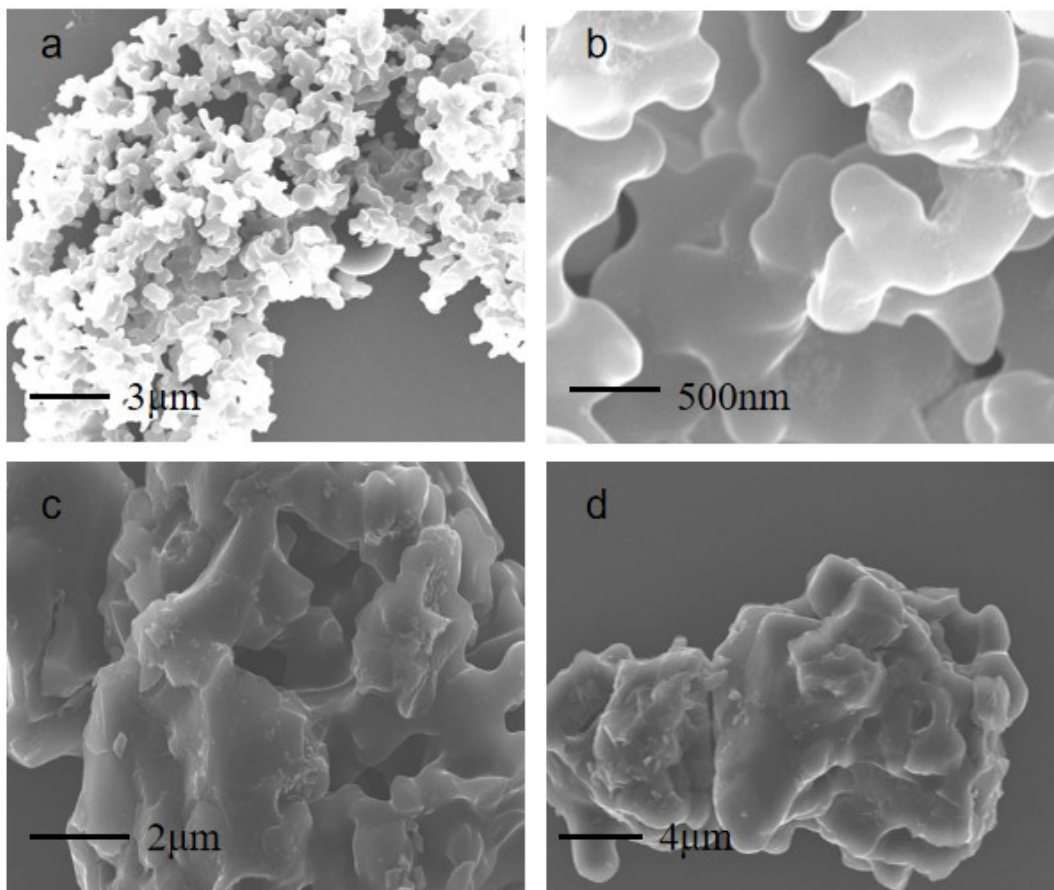

**Figure S4.** (a-b) SEM images of Resol-F127 after 900°C pyrolysis. (c-d) SEM images of samples without Resol-F127 after pyrolysis, which show an irregular collapsed bulk structure.



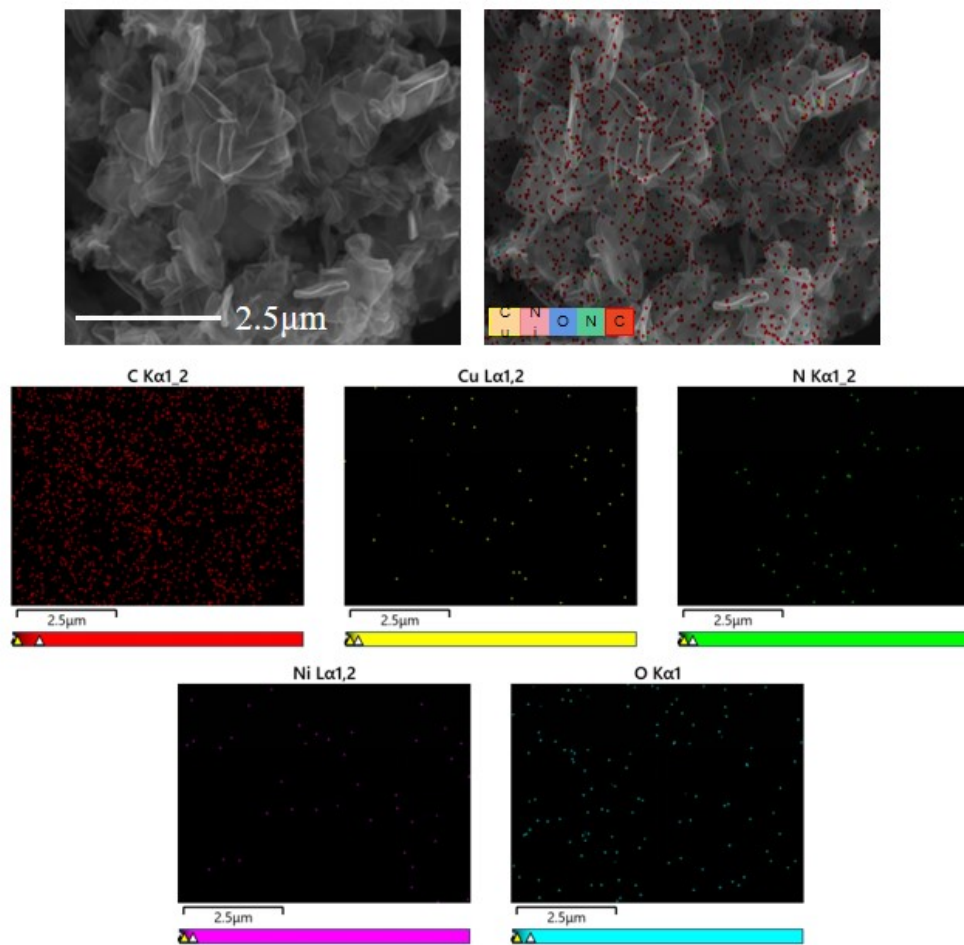

Figure S5. EDS of CuNi-N-CNS.

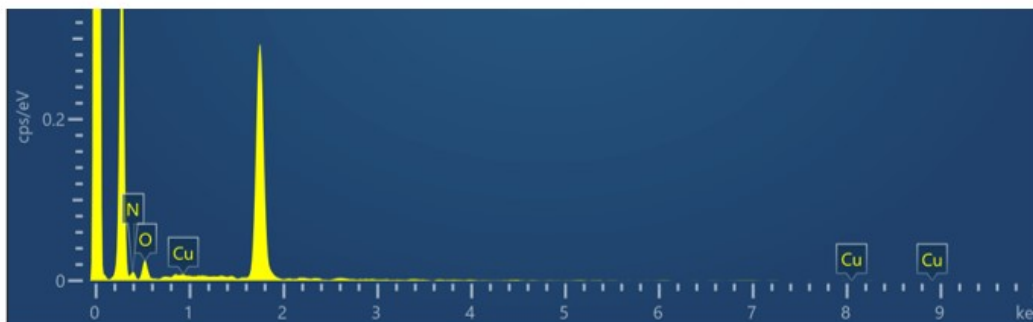

| Element       | Spectra type     | Weight percentage | Wt % Sigma | Atomic percentage |
|---------------|------------------|-------------------|------------|-------------------|
| C             | K series spectra | 73.68             | 3.98       | 79.26             |
| N             | K series spectra | 12.79             | 3.92       | 11.80             |
| O             | K series spectra | 10.18             | 1.71       | 8.22              |
| Ni            | L series spectra | 2.09              | 1.74       | 0.46              |
| Cu            | L series spectra | 1.27              | 1.35       | 0.26              |
| Total content |                  | 100.00            |            | 100.00            |

| XPS of CuNi-N-CNS |         |         |                |          |
|-------------------|---------|---------|----------------|----------|
| Name              | Peak BE | FWHM eV | Area(P) CPS.eV | Atomic % |
| C1s               | 284.97  | 3.1     | 1285440.28     | 84.48    |
| O1s               | 532.22  | 3.76    | 324212.07      | 8.39     |
| N1s               | 399.33  | 4.35    | 150938.69      | 6.25     |
| Ni2p              | 854.95  | 3.52    | 109919.86      | 0.73     |
| Cu2p1             | 951.97  | 1.75    | 3956.38        | 0.05     |
| Cu2p3             | 933.24  | 2.10    | 14067.86       | 0.08     |
| Cu LM2            | 567.00  | 0.54    | 3184.08        | 0.02     |

**Figure S6.** Comparison of element content results between EDS and XPS of CuNi-N-CNS.

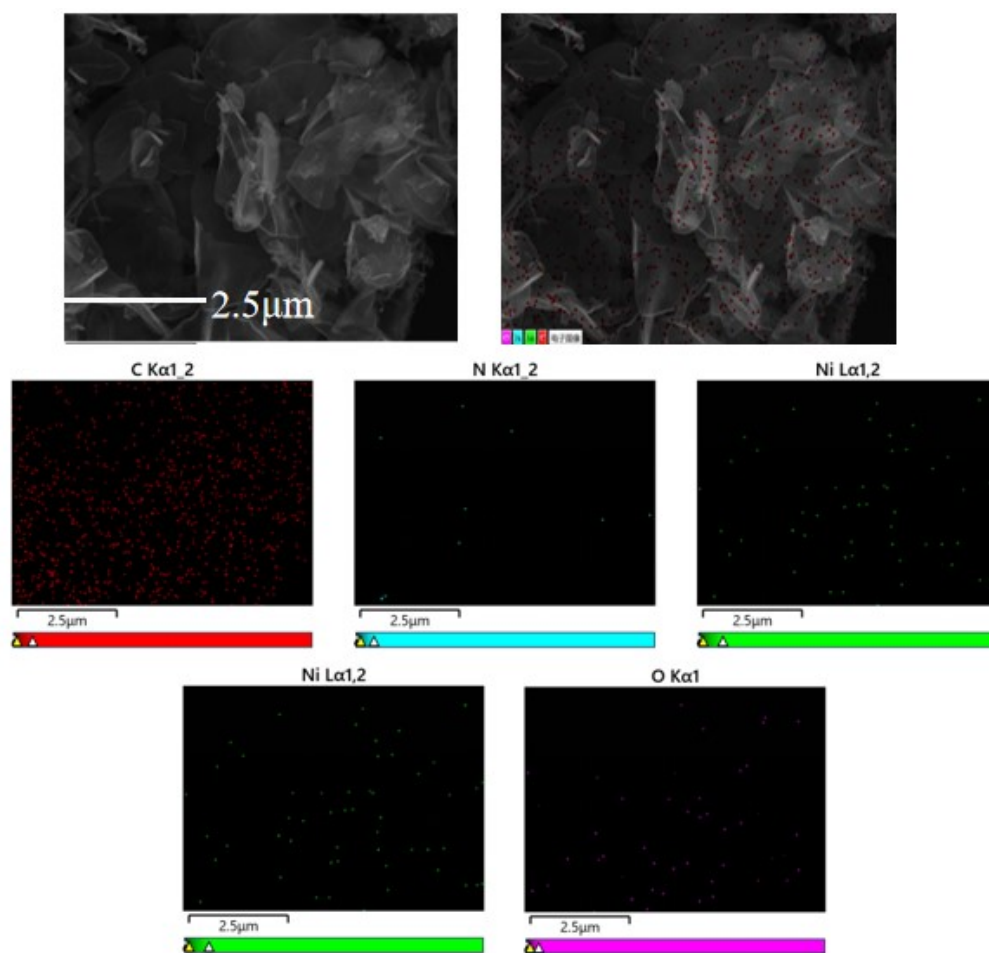

**Figure S7.** EDS of Ni-N-CNS.

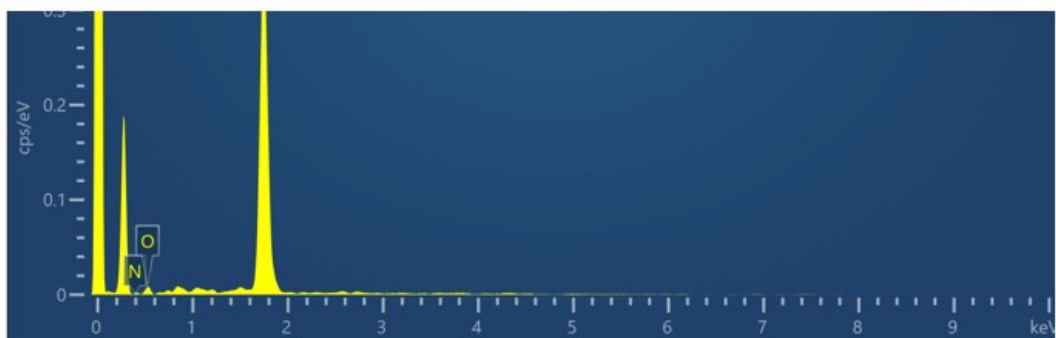

| Element       | Spectra type     | Weight percentage | Wt % Sigma | Atomic percentage |
|---------------|------------------|-------------------|------------|-------------------|
| C             | K series spectra | 82.87             | 5.71       | 88.99             |
| N             | K series spectra | 3.64              | 5.37       | 3.36              |
| O             | K series spectra | 7.99              | 2.21       | 6.44              |
| Ni            | L series spectra | 5.49              | 3.05       | 1.21              |
| Total content |                  | 100.00            |            | 100.00            |

| XPS of Ni-N-CNS |         |         |                |          |
|-----------------|---------|---------|----------------|----------|
| Name            | Peak BE | FWHM eV | Area(P) CPS.eV | Atomic % |
| C1s             | 285.01  | 3.17    | 1159144.48     | 84.98    |
| O1s             | 531.84  | 3.87    | 251579.38      | 7.26     |
| N1s             | 399.39  | 4.31    | 148557.29      | 6.86     |
| Ni2p            | 855.11  | 3.63    | 177175.83      | 0.9      |

**Figure S8.** Comparison of element content results between EDS and XPS of Ni-N-CNS.

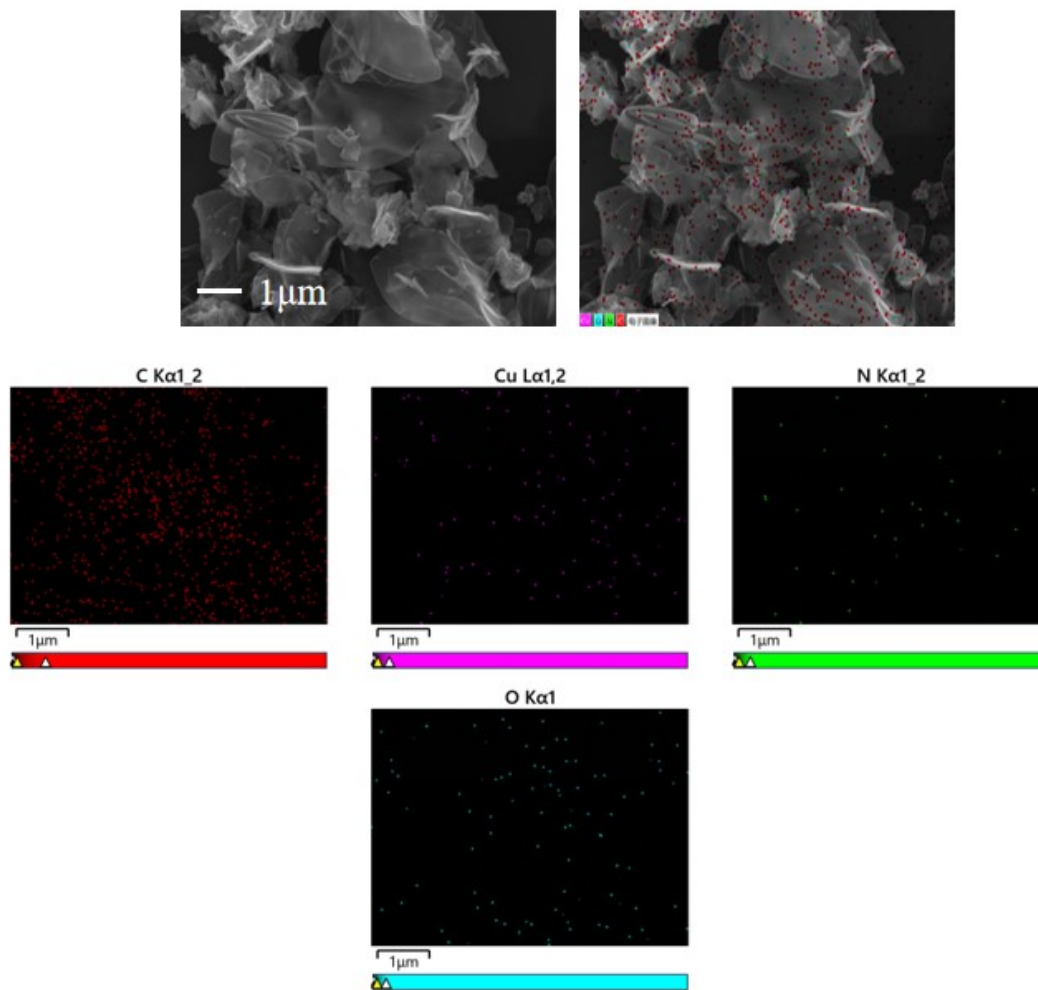

Figure S9. EDS of Cu-N-CNS.

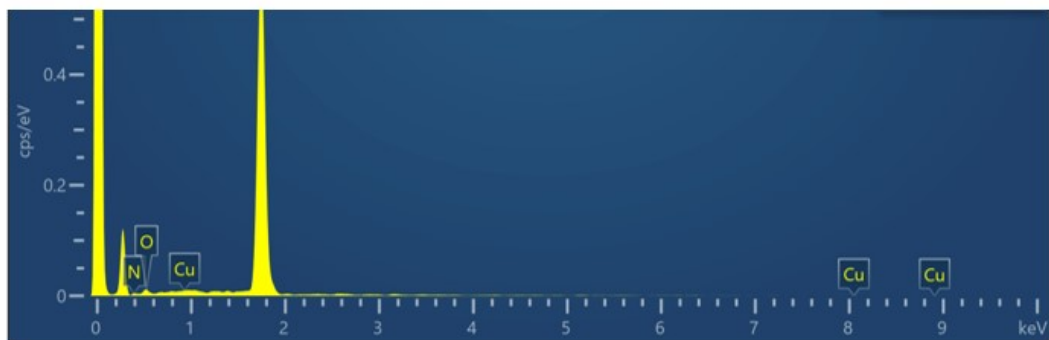

| Element       | Spectra type     | Weight percentage | Wt % Sigma | Atomic percentage |
|---------------|------------------|-------------------|------------|-------------------|
| C             | K series spectra | 76.47             | 7.93       | 80.65             |
| N             | K series spectra | 10.61             | 7.92       | 9.60              |
| O             | K series spectra | 12.12             | 3.63       | 9.60              |
| Cu            | L series spectra | 0.80              | 3.55       | 0.16              |
| Total content |                  | 100.00            |            | 100.00            |

| XPS of Cu-N-CNS |         |         |                |          |
|-----------------|---------|---------|----------------|----------|
| Name            | Peak BE | FWHM eV | Area(P) CPS.eV | Atomic % |
| C1s             | 285.01  | 3.15    | 1067842.19     | 83.88    |
| O1s             | 531.92  | 3.8     | 283323.24      | 8.77     |
| N1s             | 399.27  | 4.4     | 85736.32       | 6.96     |
| Cu2p            | 934.67  | 3.17    | 177175.83      | 0.39     |

**Figure S10.** Comparison of element content results between EDS and XPS of Cu-N-CNS.

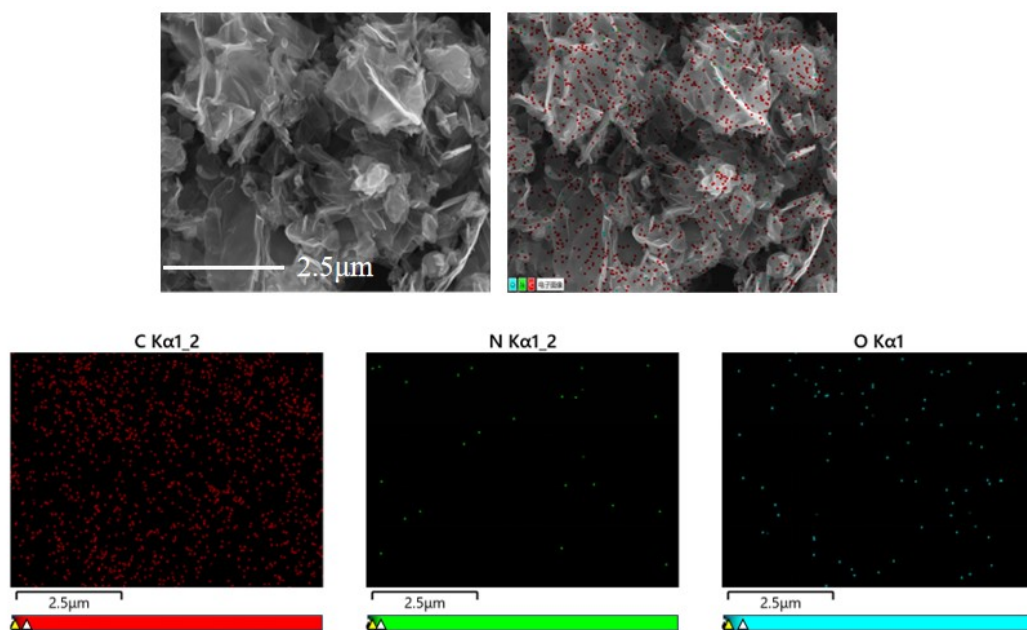

**Figure S11.** EDS of N-CNS.

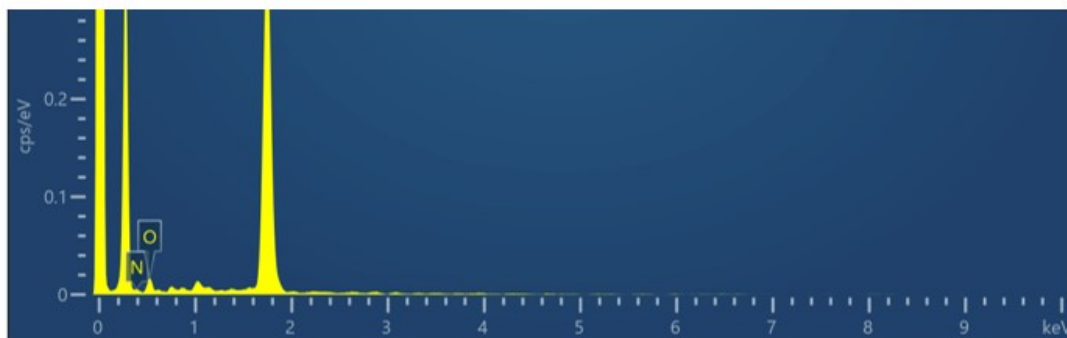

| Element       | Spectra type     | Weight percentage | Wt % Sigma | Atomic percentage |
|---------------|------------------|-------------------|------------|-------------------|
| C             | K series spectra | 82.63             | 5.12       | 85.63             |
| N             | K series spectra | 7.77              | 5.29       | 6.91              |
| O             | K series spectra | 9.60              | 2.13       | 7.47              |
| Total content |                  | 100.00            |            | 100.00            |

| XPS of N-CNS |         |         |                |          |
|--------------|---------|---------|----------------|----------|
| Name         | Peak BE | FWHM eV | Area(P) CPS.eV | Atomic % |
| C1s          | 285.02  | 3.16    | 1033573.06     | 84.47    |
| O1s          | 531.91  | 3.87    | 249591.97      | 8.03     |
| N1s          | 399.35  | 4.49    | 145665.49      | 7.5      |

**Figure S12.** Comparison of element content results between EDS and XPS of N-CNS.



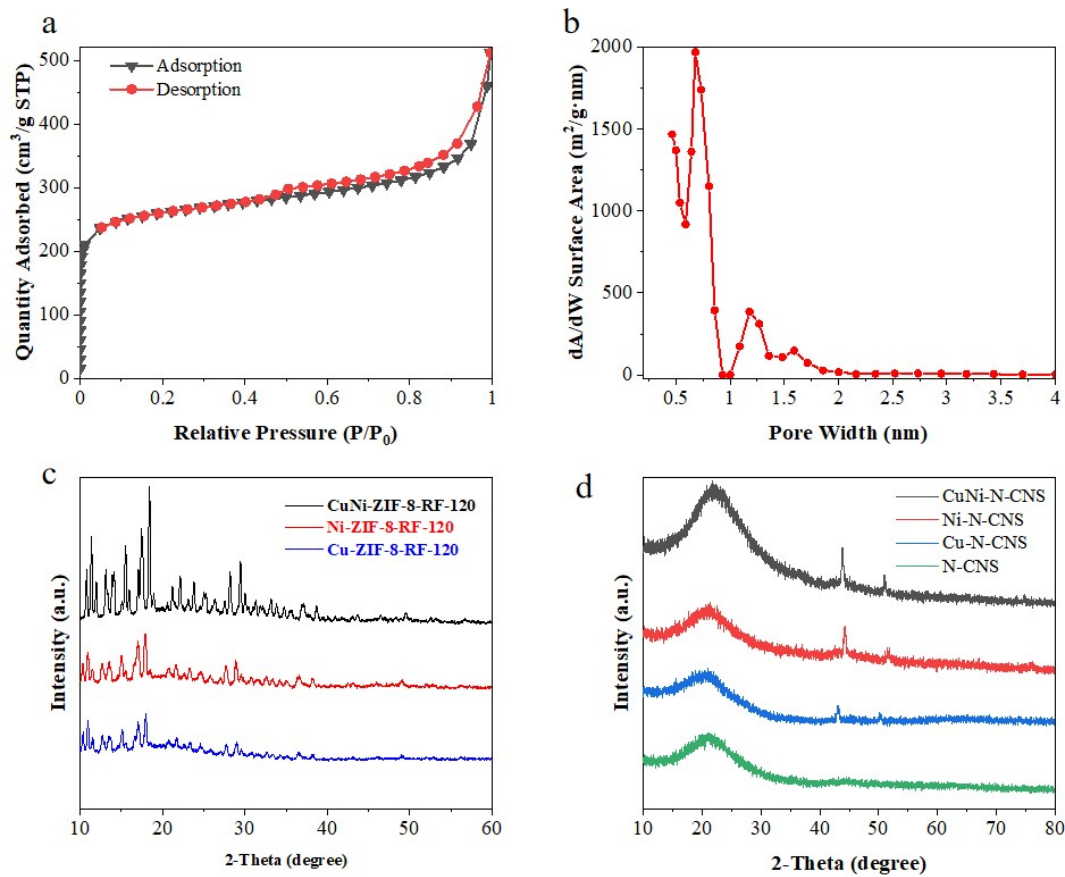

**Figure S13.** (a) N<sub>2</sub> sorption isotherms of CuNi-N-CNS. (b) Pore size distribution. (c) X-ray diffraction patterns of CuNi-ZIF-8-RF-120 °C, Ni-ZIF-8-RF-120 °C and Cu-ZIF-8-RF-120 °C. (d) X-ray diffraction patterns of CuNi-N-CNS, Ni-N-CNS, Cu-N-CNS and N-CNS.

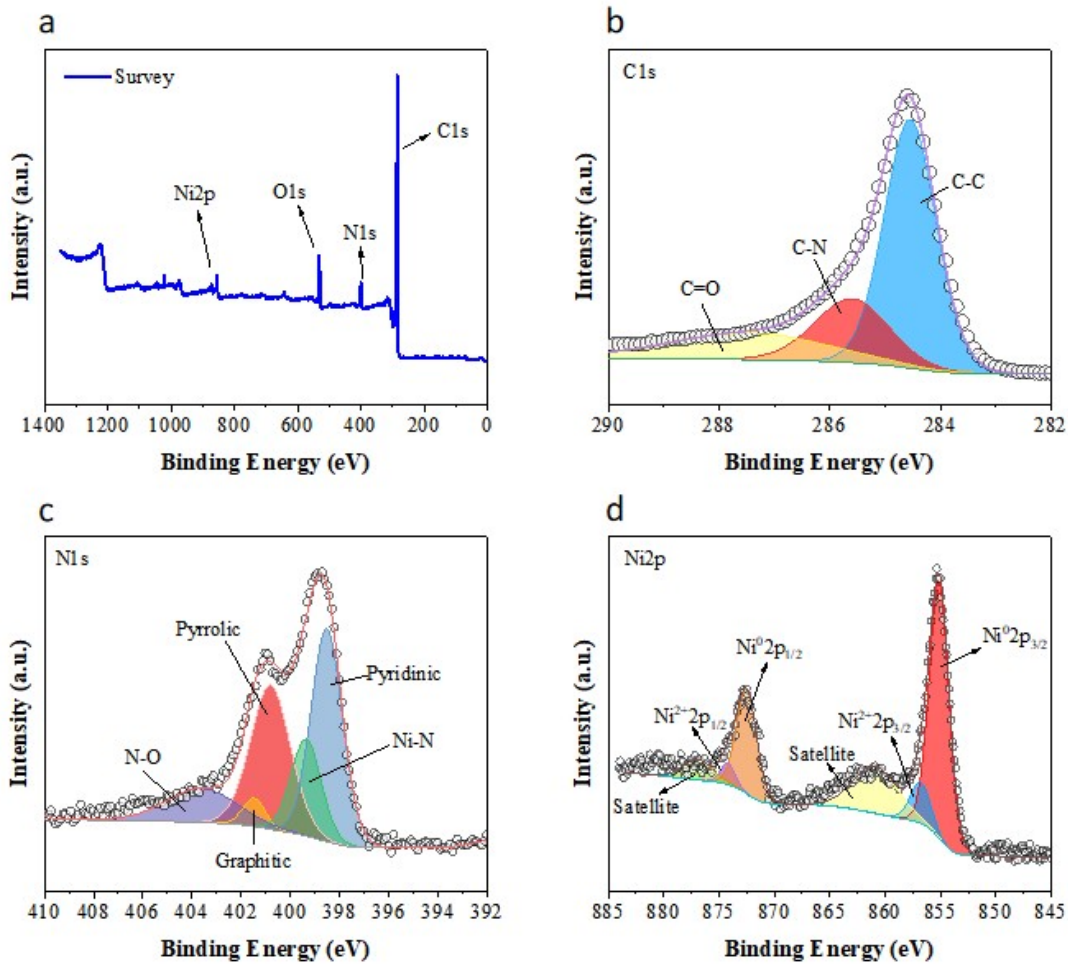

**Figure S14.** (a) The survey XPS spectra of Ni-N-CNS. (b-d) High-resolution spectra of C1s, Ni1s and Ni2p of Ni-N-CNS.

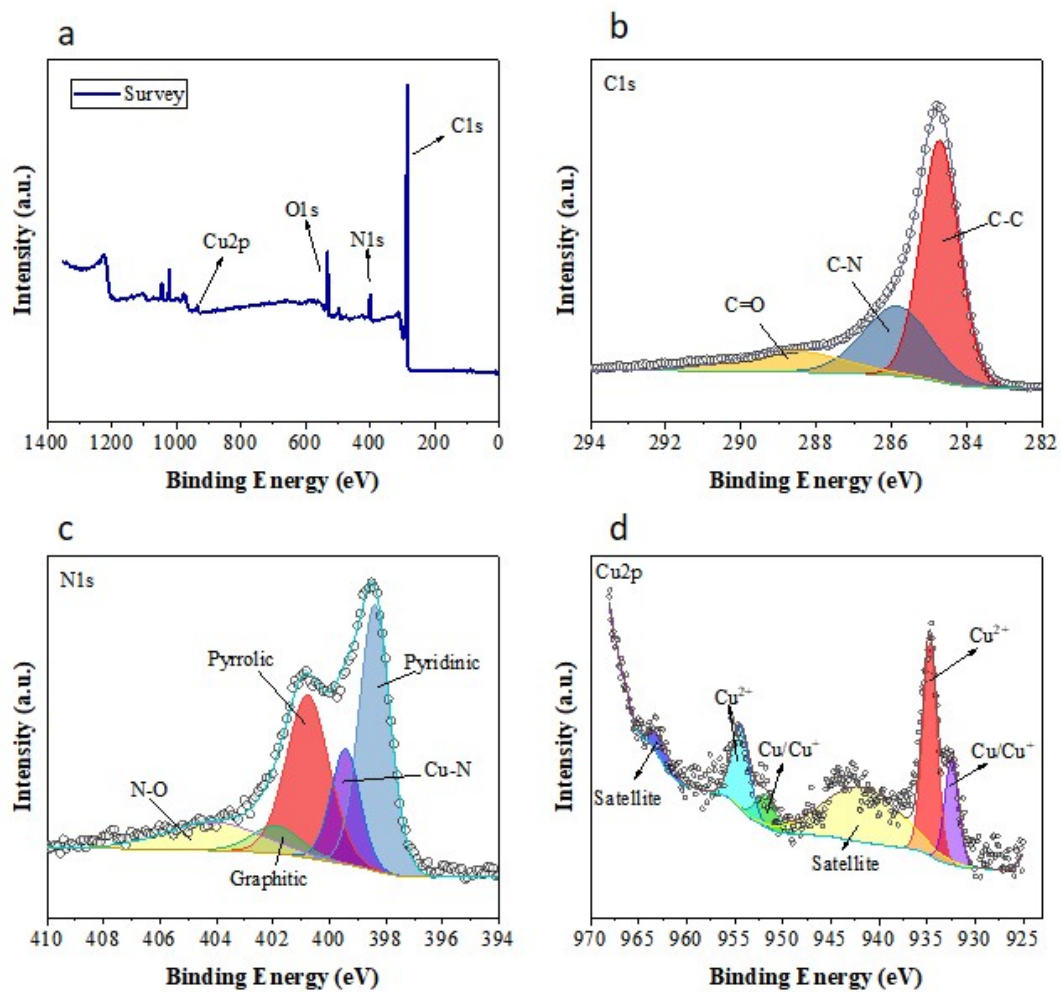

**Figure S15.** (a) The survey XPS spectrums of Cu-N-CNS. (b-d) High-resolution spectrums of C1s, N1s and Cu<sub>2</sub>p of Cu-N-CNS.

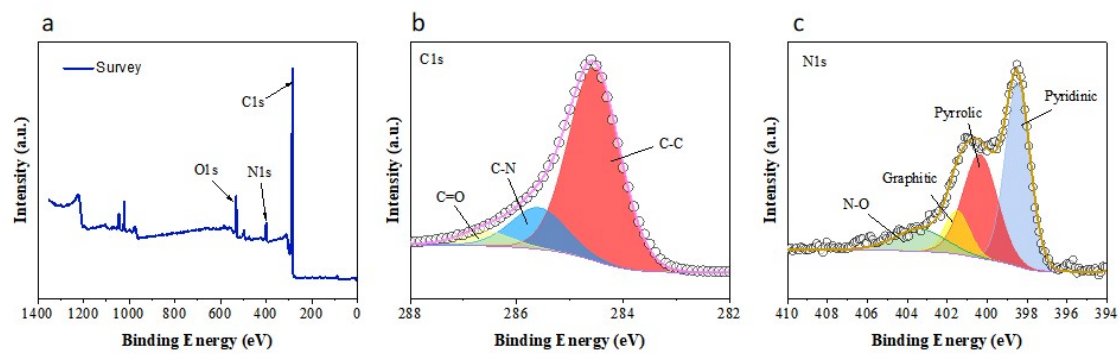

**Figure S16.** (a) The survey XPS spectrums of N-CNS. (b-c) High-resolution spectrums of C1s and N1s of N-CNS.

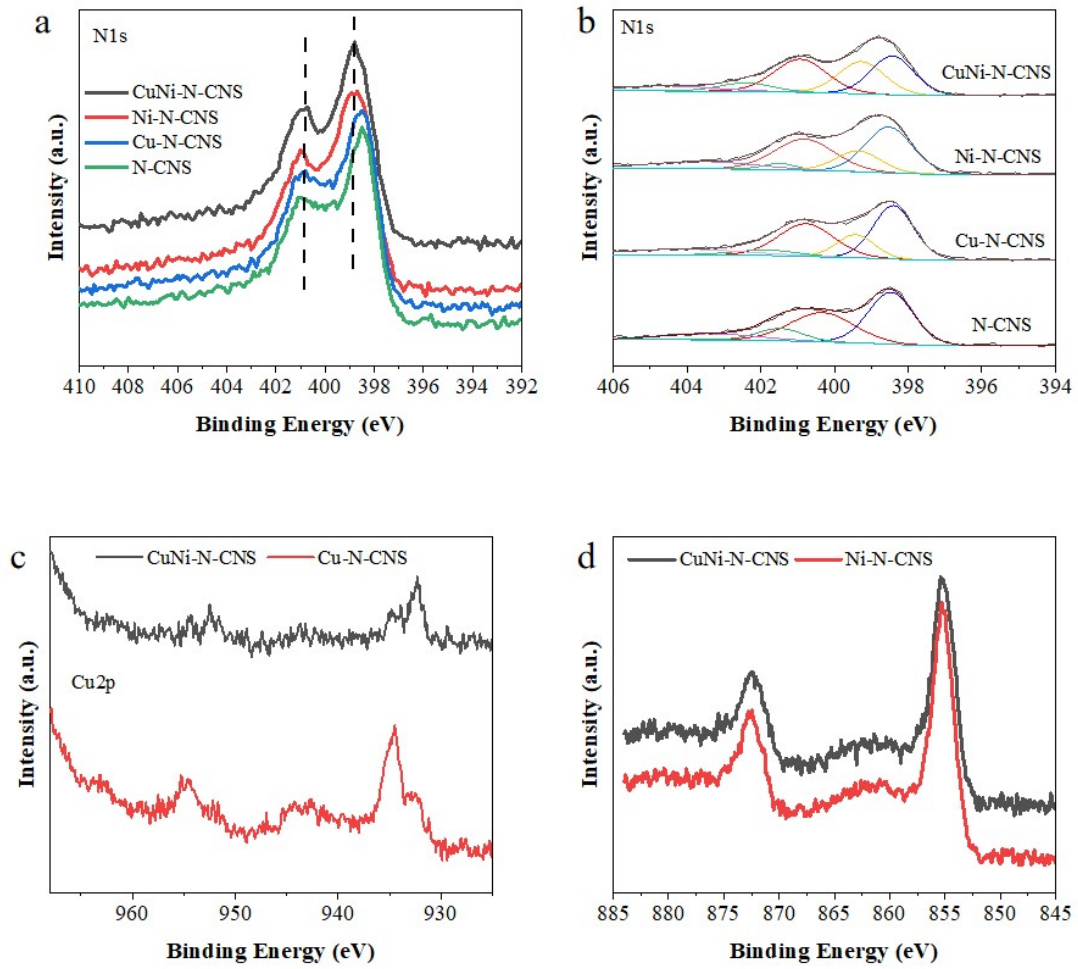

**Figure S17.** The energy shift in the spectrum of CuNi-N-CNS compared with controlled sample.

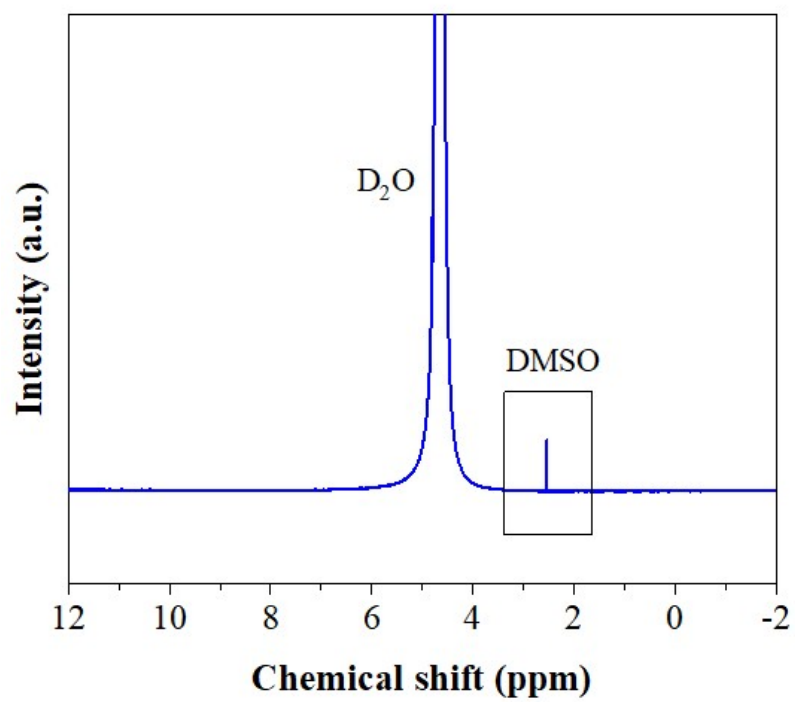

**Figure S18.** <sup>1</sup>H NMR result of liquid products after electrolysis. The result shows that no liquid product is generated.

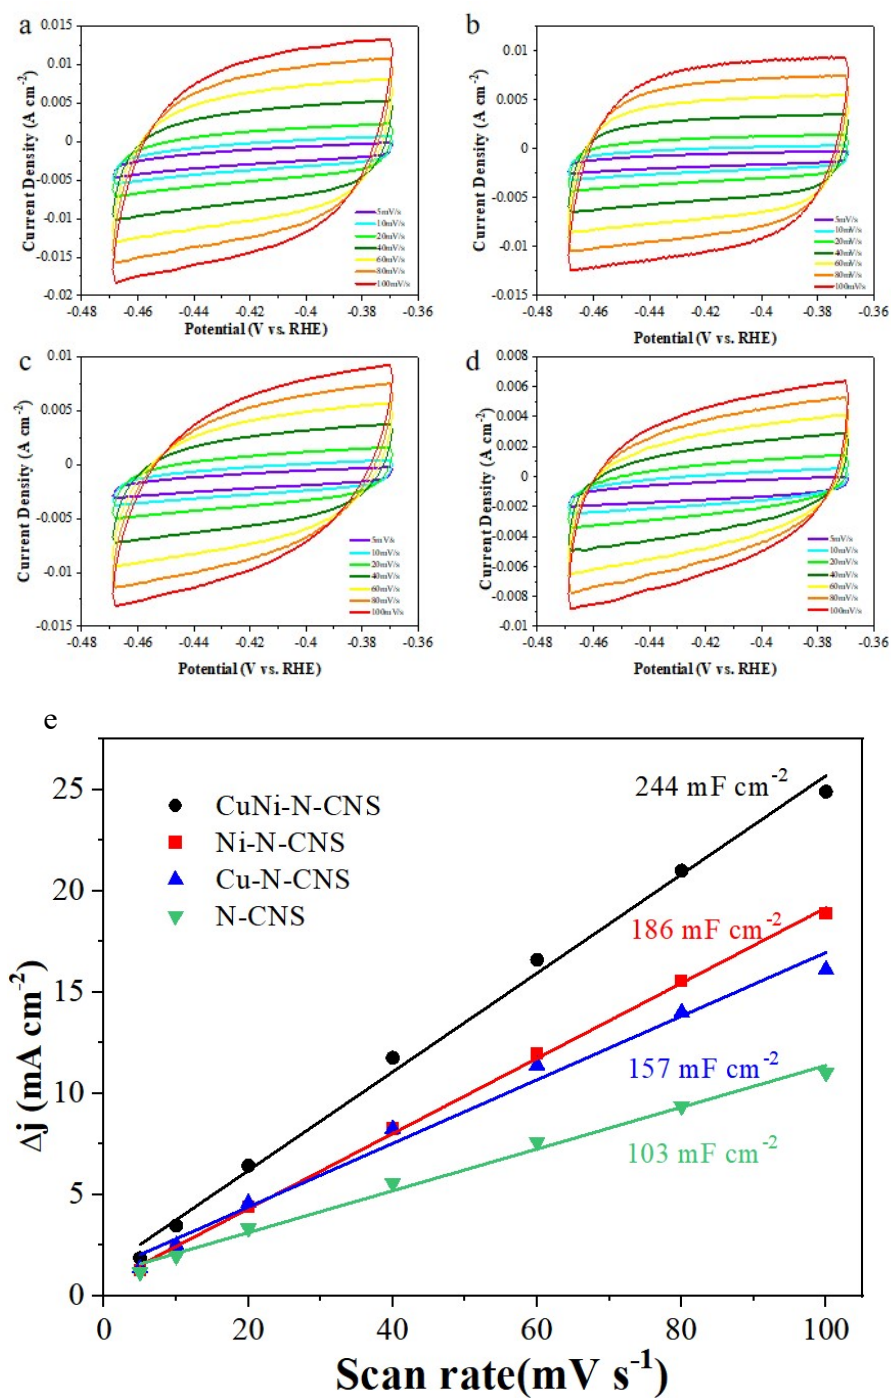

**Figure S19.** (a-d) CV curves of CuNi-N-CNS, Ni-N-CNS, Cu-N-CNS and N-CNS. (e) ECSAs of CuNi-N-CNS, Ni-N-CNS, Cu-N-CNS and N-C.



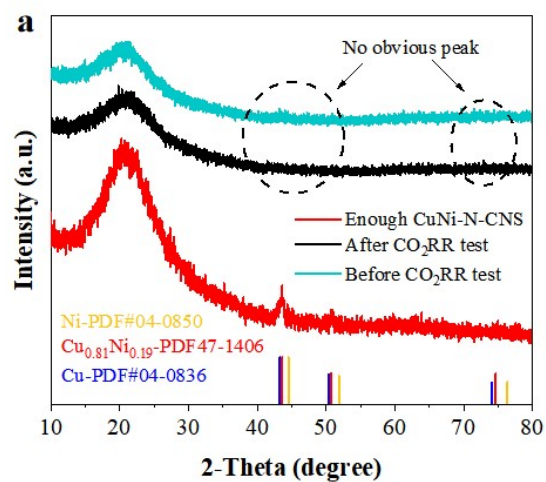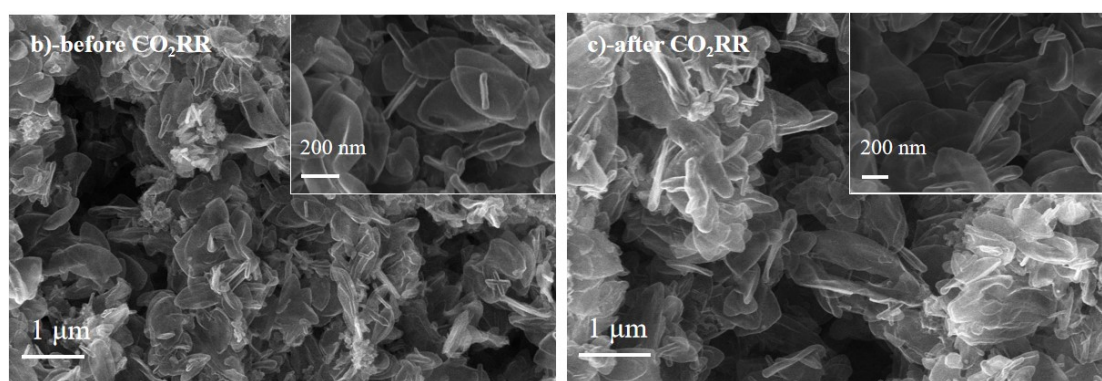

**Figure S20.** (a) XRD patterns of enough CuNi-N-CNS powder, small amount of samples scraped from carbon paper before and after electrolysis. (b-c) SEM images of CuNi-N-CNS before and after CO<sub>2</sub>RR.



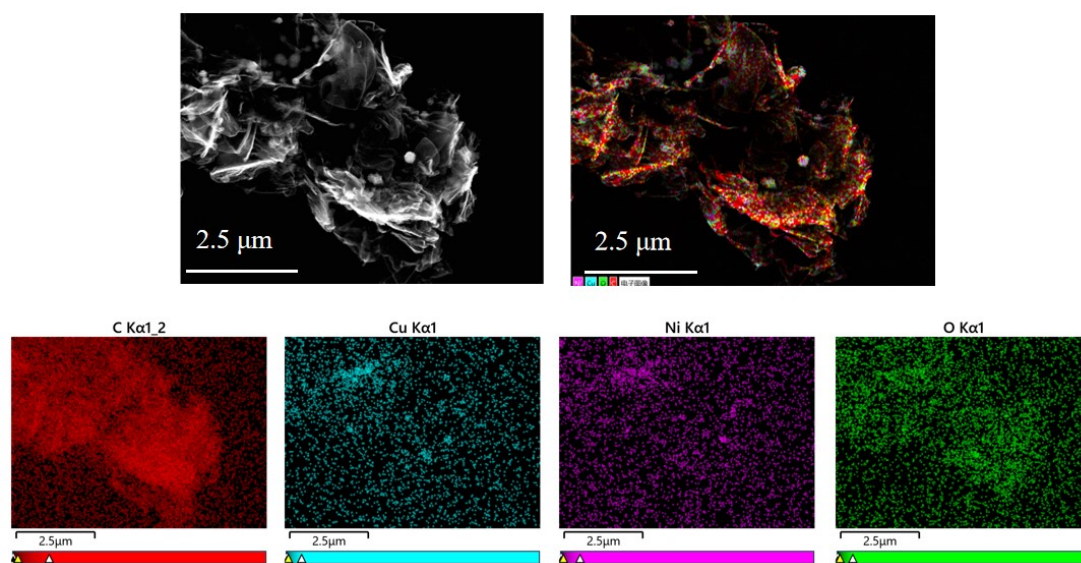

**Figure S21.** Element mapping of CuNi-N-CNS after electrolysis.

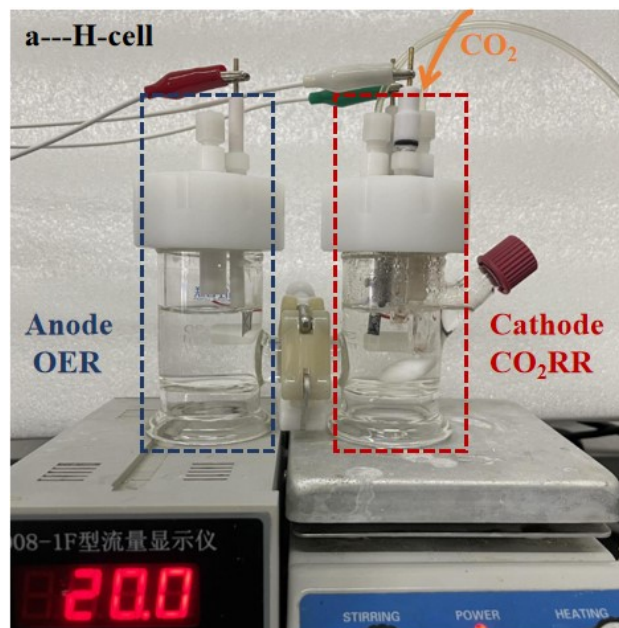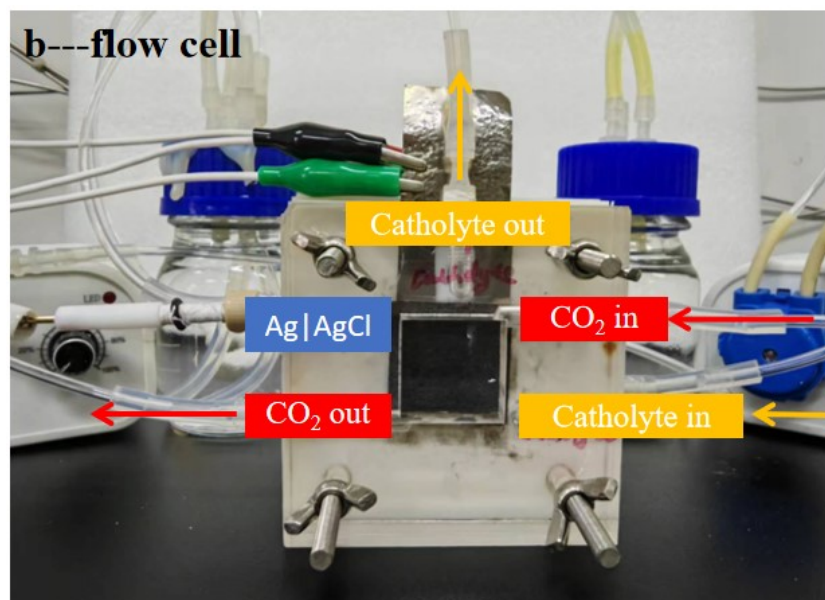

**Figure S22.** H-cell and self-assembly flow cell.

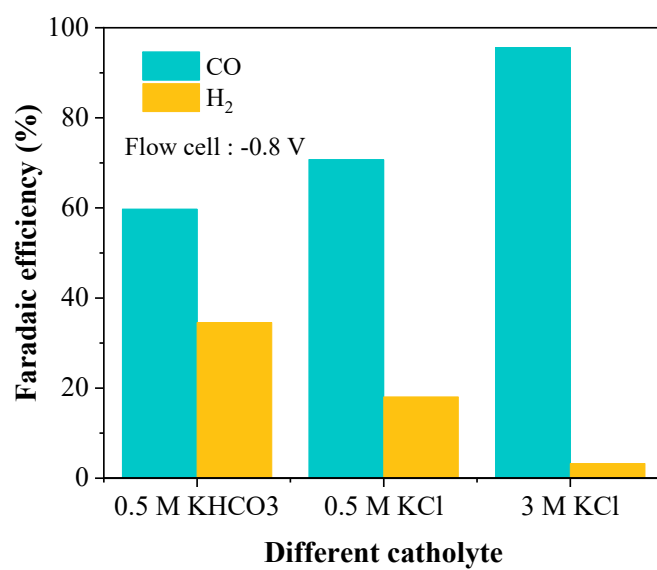

**Figure S23.** Effects of different electrolytes and concentrations on product distribution at -0.8 V.

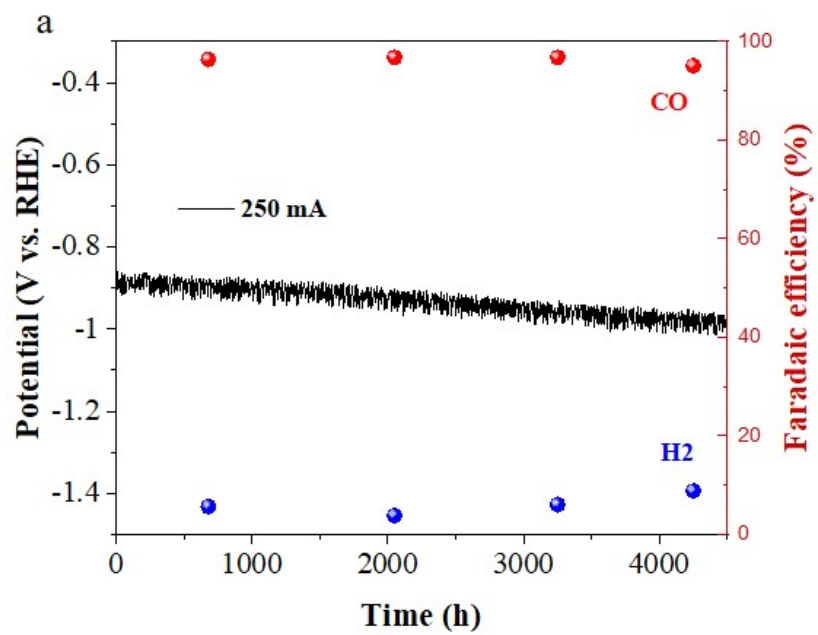

**Figure S24.** Potential-time response of CuNi-N-CNS in three-electrode flow cell for CO<sub>2</sub>RR and the corresponding faradaic efficiency for CO/H<sub>2</sub> production at current densities of 250 mA cm<sup>-2</sup>.

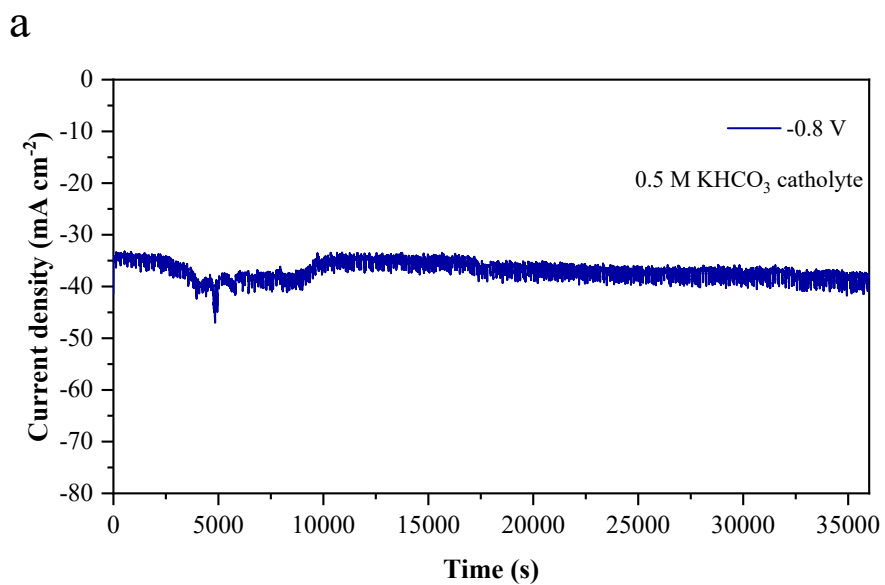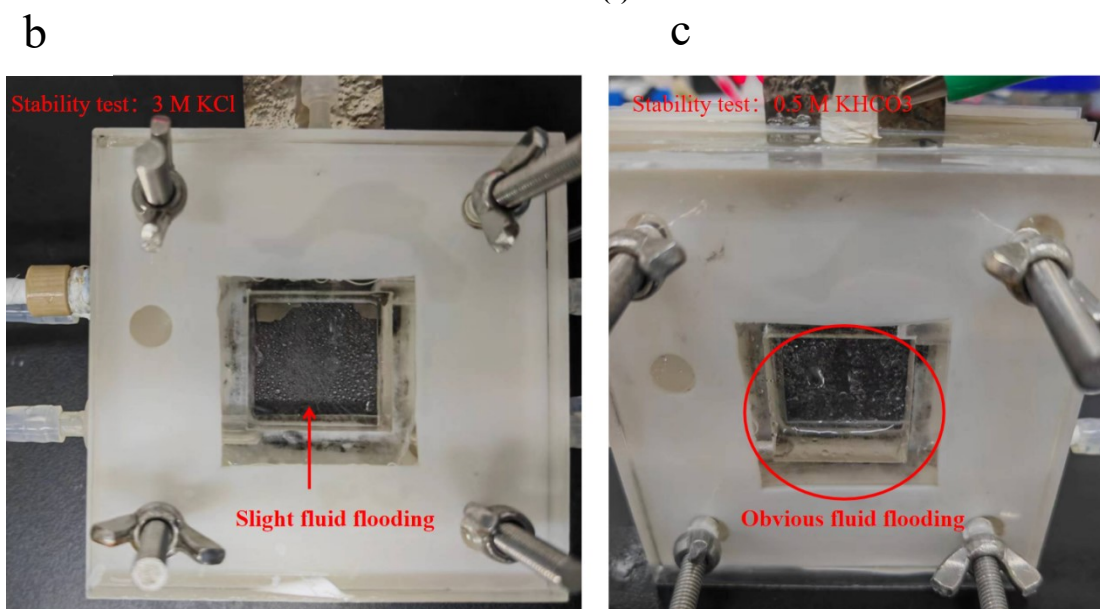

**Figure S25.** (a) Long-term test of CuNi-N-CNS in flow cell with 0.5 M  $\text{KHCO}_3$  solution as catholyte. (b-c) Comparison of liquid flooding after stability test with different catholytes.

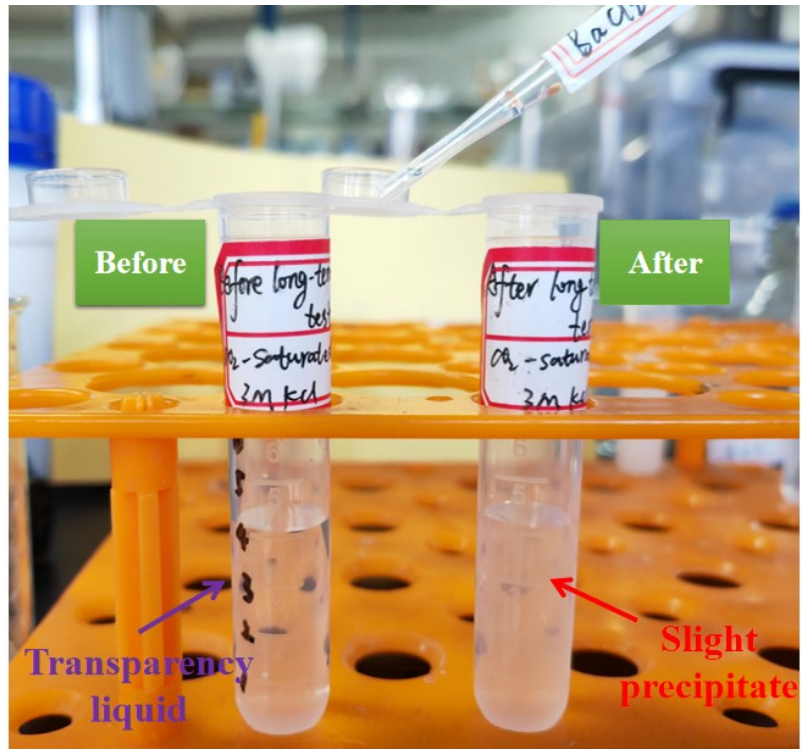

Figure S26. Precipitation experiment.

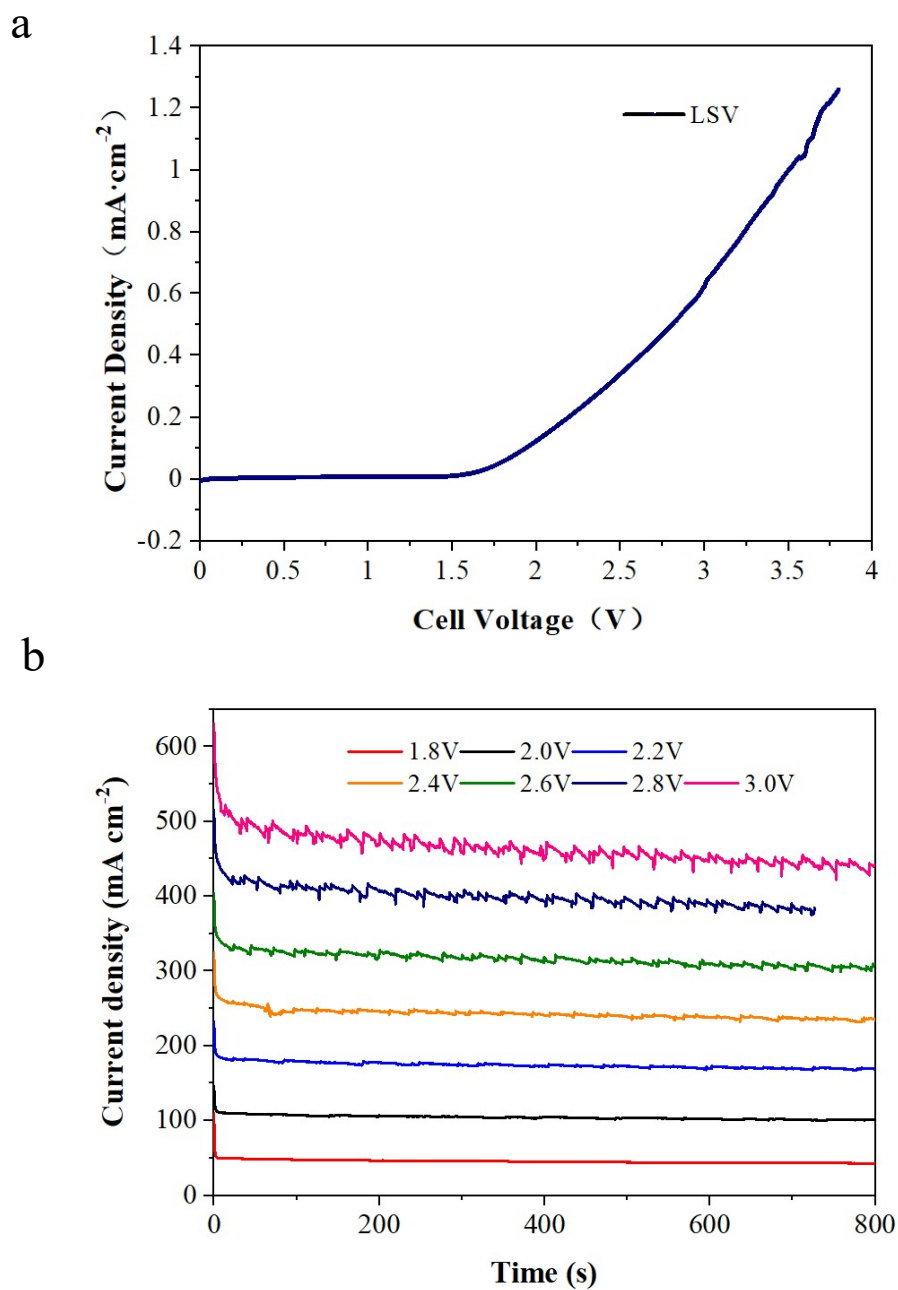

**Figure S27.** (a) LSV and (b) i-t curves of two-electrode system in flow cell.

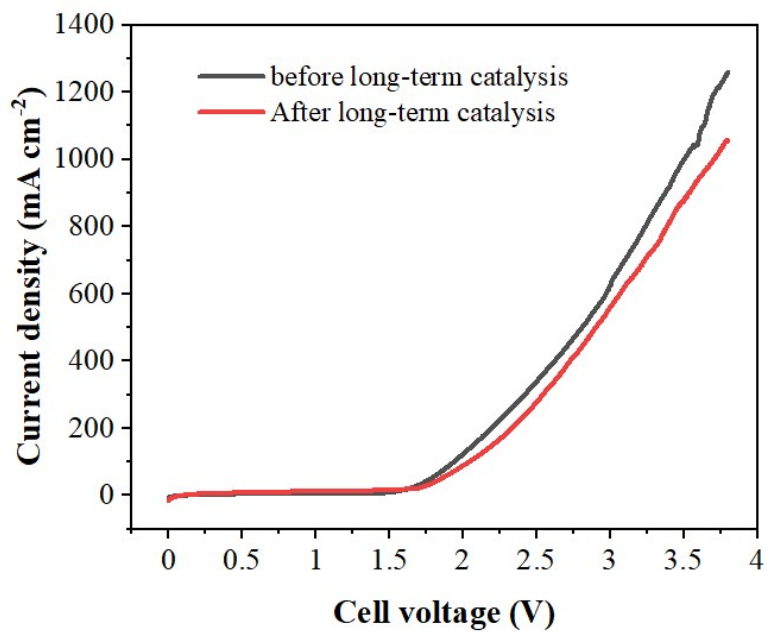

**Figure S28.** LSV curves comparison before and after long-term stability test. The performance was not degraded much after long-term stability test.



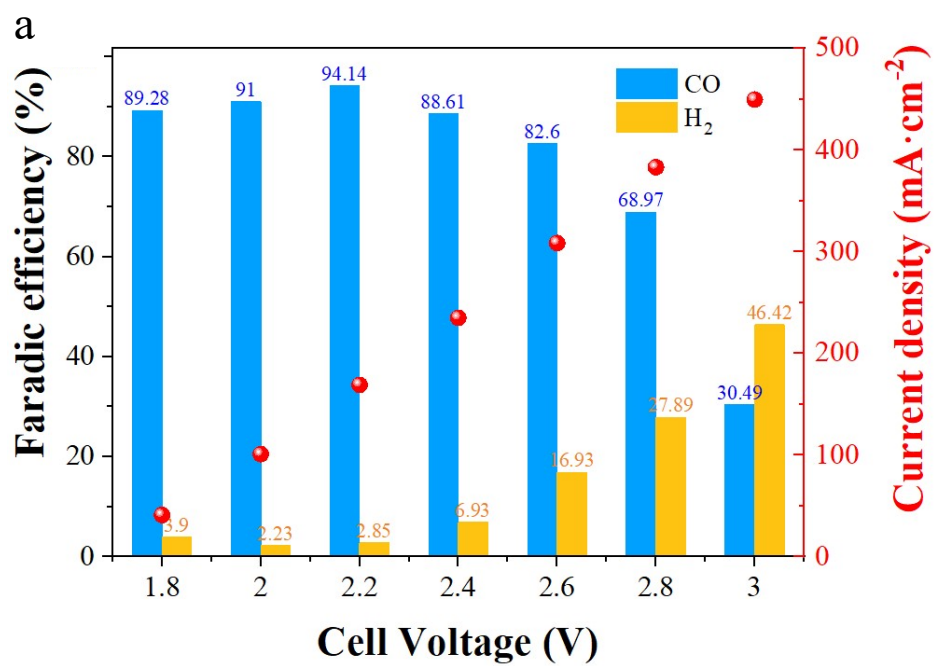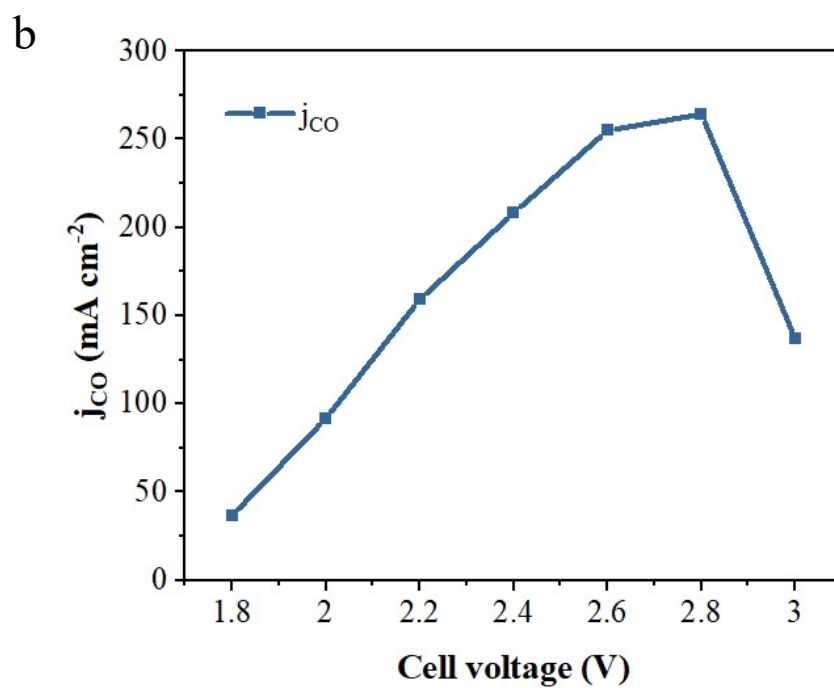

**Figure S29.** (a)  $FE_{CO}$  and (b)  $j_{CO}$  of different potentials.

## Reference

- 1 H. Cheng, X. Wu, M. Feng, X. Li, G. Lei, Z. Fan, D. Pan, F. Cui and G. He, Atomically Dispersed Ni/Cu Dual Sites for Boosting the CO<sub>2</sub> Reduction Reaction, *ACS Catal.*, 2021, **11**, 12673-12681.
- 2 Z. Chen, X. Zhang, W. Liu, M. Jiao, K. Mou, X. Zhang and L. Liu, Amination strategy to boost the CO<sub>2</sub> electroreduction current density of M–N/C single-atom catalysts to the industrial application level, *Energy Environ. Sci.*, 2021, **14**, 2349-2356.
- 3 Y. Cheng, S. Zhao, H. Li, S. He, J.-P. Veder, B. Johannessen, J. Xiao, S. Lu, J. Pan, M. F. Chisholm, S.-Z. Yang, C. Liu, J. G. Chen and S. P. Jiang, Unsaturated edge-anchored Ni single atoms on porous microwave exfoliated graphene oxide for electrochemical CO<sub>2</sub>, *Appl. Catal. B Environ.*, 2019, **243**, 294-303.
- 4 Y. Gang, E. Sarnello, J. Pellessier, S. Fang, M. Suarez, F. Pan, Z. Du, P. Zhang, L. Fang, Y. Liu, T. Li, H.-C. Zhou, Y. H. Hu and Y. Li, One-Step Chemical Vapor Deposition Synthesis of Hierarchical Ni and N Co-Doped Carbon Nanosheet/Nanotube Hybrids for Efficient Electrochemical CO<sub>2</sub> Reduction at Commercially Viable Current Densities, *ACS Catal.*, 2021, **11**, 10333-10344.
- 5 K. Jiang, S. Siahrostami, T. Zheng, Y. Hu, S. Hwang, E. Stavitski, Y. Peng, J. Dynes, M. Gangisetty, D. Su, K. Attenkofer and H. Wang, Isolated Ni single atoms in graphene nanosheets for high-performance CO<sub>2</sub> reduction, *Energy Environ. Sci.*, 2018, **11**, 893-903.
- 6 W. Ren, X. Tan, W. Yang, C. Jia, S. Xu, K. Wang, S. C. Smith and C. Zhao, Isolated Diatomic Ni-Fe Metal-Nitrogen Sites for Synergistic Electroreduction of CO<sub>2</sub>, *Angew. Chem., Int. Ed.*, 2019, **58**, 6972-6976.
- 7 W. Xiong, H. Li, H. Wang, J. Yi, H. You, S. Zhang, Y. Hou, M. Cao, T. Zhang and R. Cao, Hollow Mesoporous Carbon Sphere Loaded Ni-N<sub>4</sub> Single-Atom: Support Structure Study for CO<sub>2</sub> Electrocatalytic Reduction Catalyst, *Small*, 2020, **16**, e2003943.
- 8 H. Yang, Q. Lin, C. Zhang, X. Yu, Z. Cheng, G. Li, Q. Hu, X. Ren, Q. Zhang, J. Liu and C. He, Carbon dioxide electroreduction on single-atom nickel decorated carbon membranes with industry compatible current densities, *Nat. Commun.*, 2020, **11**, 593.
